# Supplementary material
Source: publisher site journal article supplement (https://www.dovepress.com/article/568722)
Supplement: Supplementary file 1 [file 568722_Appendix%20I.docx]

**Appendix 1.**

## Rating Scale and Calculation Method

The rating tool uses a scale from **1 to 5**, where:

- **5:** Perfectly Met
- **4:** Well Met
- **3:** Partially Met
- **2:** Minimally Met
- **1:** Not Met

The score for each criterion is calculated using the following formula:

**Criterion Score** =

The **total score** for a particular product or supplier is the sum of the scores from all 16 criteria. The maximum possible score for any single criterion is ​, so the maximum possible total score is the sum of all weights, which is 100%.

**Total Score**

## MCDA Rating Tool

The table below outlines the 16 criteria, their assigned weights, and columns for rating and scoring. To use the tool, assign a rating (from 1 to 5) for each criterion and then calculate the score. The sum of the scores in the final column represents the total score for the assessed pharmaceutical product.

| **N** | **Criteria** | **Weight (%)** | **Rating (1-5)** | **Score** |
| --- | --- | --- | --- | --- |
| 1 | Published data in peer-reviewed journal articles on drug effectiveness | 11.56 |  |  |
| 2 | Drug delivery system | 8.84 |  |  |
| 3 | Drug bioequivalence | 7.56 |  |  |
| 4 | Real-world data generation | 7.36 |  |  |
| 5 | Drug stability | 7.26 |  |  |
| 6 | Direct cost | 7.08 |  |  |
| 7 | Supply track record | 6.58 |  |  |
| 8 | Labeled indications, formulations, and strengths | 6.31 |  |  |
| 9 | Drug safety profile | 5.98 |  |  |
| 10 | Quality assurance of APIs and production process | 5.58 |  |  |
| 11 | Level of interchangeability | 5.04 |  |  |
| 12 | Contribution to national healthcare priorities | 4.77 |  |  |
| 13 | Availability in reference countries | 4.43 |  |  |
| 14 | Manufacturing site quality certification | 4.39 |  |  |
| 15 | Pharmaceutical equivalence | 4.03 |  |  |
| 16 | Pharmacovigilance | 3.23 |  |  |
| **Total** |  | **100.00** |  | **(Total Score)** |
